# Supplementary material
Source: PubMed Central journal article supplement (PMC6439785)
Supplement: jamaophthalmol-137-58-s001.pdf [file jamaophthalmol-137-58-s001.pdf]

## Supplementary Online Content

Campbell RJ, El-Defrawy SR, Gill SS, et al. Association of cataract surgical outcomes with late surgeon career stages: a population-based cohort study. *JAMA Ophthalmol*. Published online October 11, 2018. doi:10.1001/jamaophthalmol.2018.4886

**eAppendix.** Detail of the study outcome coding

**eTable 1.** Effect of late surgeon career stage and covariates on posterior capsule rupture risk

**eTable 2.** Effect of late surgeon career stage and covariates on dropped lens fragment risk

**eTable 3.** Effect of late surgeon career stage and covariates on retinal detachment risk

**eTable 4.** Effect of late surgeon career stage and covariates on suspected endophthalmitis risk

This supplementary material has been provided by the authors to give readers additional information about their work.

## eAPPENDIX. Details of Study Outcome Coding

(Ontario Hospital Insurance Plan database)

| STUDY OUTCOME             | CODING                                                                                                                                                                                                                                                                                             |
|---------------------------|----------------------------------------------------------------------------------------------------------------------------------------------------------------------------------------------------------------------------------------------------------------------------------------------------|
| Posterior capsule rupture | fee_schedule_code= 'E940A'<br>service_date=reg_dt                                                                                                                                                                                                                                                  |
| Dropped lens fragments    | fee_schedule_code = ('E142A' or 'E148A')<br>1<=service_date-reg_dt <=14                                                                                                                                                                                                                            |
|                           | AND                                                                                                                                                                                                                                                                                                |
|                           | fee_schedule_code ='E141A'<br>service_date = service_date of E142A or E148A                                                                                                                                                                                                                        |
| Retinal detachment        | fee_schedule_code = ('E152A', 'E142A', or 'E148A')<br>1<=service_date-reg_dt <=14                                                                                                                                                                                                                  |
|                           | AND                                                                                                                                                                                                                                                                                                |
|                           | fee_schedule_code='E936A'<br>service_date = service_date of E152A, E142A or E148A                                                                                                                                                                                                                  |
| Suspected endophthalmitis | fee_schedule_code= ('E142A' or 'E148A')<br>1<=service_date-reg_dt <=14<br>- excluding cases where<br>(fee_schedule_code='E936A' and service_date =<br>service_date of E142A or E148A)<br>- excluding cases where<br>(fee_schedule_code='E141A' and service_date=<br>service date of E142A or E148A |
|                           | OR                                                                                                                                                                                                                                                                                                 |
|                           | fee_schedule_code='E149A'<br>1<=service_date-reg_dt<=14<br>- excluding cases where<br>(fee_schedule_code='E936A' and<br>service_date=service_date of E149A)<br>- excluding cases where<br>(fee_schedule_code='E151A' and service_date is<br>between 1 and 14 days of service_date of E149A)        |

**eTable 1. Effect of late surgeon career stage and covariates on posterior capsule rupture risk<sup>a,b</sup>**

|                                                    | Odds Ratio | 95% Confidence Interval | p-Value |
|----------------------------------------------------|------------|-------------------------|---------|
| <b>Surgeon Level Effects</b>                       |            |                         |         |
| Late career <sup>c</sup>                           | 0.89       | 0.65 to 1.21            | 0.447   |
| Early career <sup>c</sup>                          | 1.11       | 0.87 to 1.40            | 0.399   |
| Surgical volume (25-250 cases/year) <sup>d</sup>   | 2.65       | 1.66 to 4.22            | <0.001  |
| Surgical volume (251-500 cases/year) <sup>d</sup>  | 1.87       | 1.22 to 2.86            | 0.004   |
| Surgical volume (501-1000 cases/year) <sup>d</sup> | 1.20       | 0.81 to 1.76            | 0.364   |
| <b>Patient Level Effects</b>                       |            |                         |         |
| Female gender                                      | 0.94       | 0.85 to 1.04            | 0.224   |
| Age (71-75) <sup>e</sup>                           | 1.13       | 0.98 to 1.31            | 0.084   |
| Age (76-80) <sup>e</sup>                           | 1.09       | 0.94 to 1.27            | 0.262   |
| Age (≥81) <sup>e</sup>                             | 1.61       | 1.41 to 1.84            | <0.001  |
| Number of unique medications used <sup>f</sup>     | 1.02       | 1.01 to 1.02            | <0.001  |
| Glaucoma medication use <sup>g</sup>               | 1.38       | 1.20 to 1.58            | <0.001  |
| Tamsulosin use <sup>f</sup>                        | 1.29       | 1.07 to 1.56            | 0.008   |
| Diabetes                                           | 1.01       | 0.91 to 1.12            | 0.877   |
| <b>Non-academic surgical center</b> <sup>h</sup>   | 0.81       | 0.63 to 1.05            | 0.111   |

<sup>a</sup> Overall cataract surgery complications represent a composite of the four individual cataract surgical complications (posterior capsule rupture, dropped lens fragments, retinal detachment, and suspected endophthalmitis).

<sup>b</sup> Adjusted for calendar year to control for secular trends

<sup>c</sup> Reference category: Mid career (15-25 years since medical school graduation)

<sup>d</sup> Reference category: Surgical volume (>1000 cases/year)

<sup>e</sup> Reference category: Age (66-70 years)

<sup>f</sup> Within the year preceding surgery

<sup>g</sup> Within the 90 days preceding surgery

<sup>h</sup> Reference category: Academic surgical center

**eTable 2. Effect of late surgeon career stage and covariates on dropped lens fragment risk<sup>a,b</sup>**

|                                                    | <b>Odds Ratio</b> | <b>95% Confidence Interval</b> | <b>p-Value</b> |
|----------------------------------------------------|-------------------|--------------------------------|----------------|
| <b>Surgeon Level Effects</b>                       |                   |                                |                |
| Late career <sup>c</sup>                           | 2.30              | 1.50 to 3.54                   | <0.001         |
| Early career <sup>c</sup>                          | 1.35              | 0.80 to 2.28                   | 0.252          |
| Surgical volume (25-250 cases/year) <sup>d</sup>   | 7.56              | 3.16 to 18.09                  | <0.001         |
| Surgical volume (251-500 cases/year) <sup>d</sup>  | 4.66              | 2.08 to 10.43                  | 0.000          |
| Surgical volume (501-1000 cases/year) <sup>d</sup> | 3.19              | 1.48 to 6.90                   | 0.003          |
| <b>Patient Level Effects</b>                       |                   |                                |                |
| Female gender                                      | 0.91              | 0.72 to 1.15                   | 0.422          |
| Age (71-75) <sup>e</sup>                           | 1.02              | 0.71 to 1.46                   | 0.926          |
| Age (76-80) <sup>e</sup>                           | 1.17              | 0.82 to 1.69                   | 0.384          |
| Age (≥81) <sup>e</sup>                             | 1.66              | 1.20 to 2.29                   | 0.002          |
| Number of unique medications used <sup>f</sup>     | 1.02              | 1.00 to 1.04                   | 0.016          |
| Glaucoma medication use <sup>g</sup>               | 1.15              | 0.82 to 1.61                   | 0.422          |
| Tamsulosin use <sup>f</sup>                        | 1.82              | 1.24 to 2.69                   | 0.002          |
| Diabetes                                           | 1.05              | 0.83 to 1.33                   | 0.699          |
| <b>Non-academic surgical center<sup>h</sup></b>    | <b>0.81</b>       | <b>0.55 to 1.20</b>            | <b>0.286</b>   |

<sup>a</sup> Overall cataract surgery complications represent a composite of the four individual cataract surgical complications (posterior capsule rupture, dropped lens fragments, retinal detachment, and suspected endophthalmitis).

<sup>b</sup> Adjusted for calendar year to control for secular trends

<sup>c</sup> Reference category: Mid career (15-25 years since medical school graduation)

<sup>d</sup> Reference category: Surgical volume (>1000 cases/year)

<sup>e</sup> Reference category: Age (66-70 years)

<sup>f</sup> Within the year preceding surgery

<sup>g</sup> Within the 90 days preceding surgery

<sup>h</sup> Reference category: Academic surgical center

**eTable 3. Effect of late surgeon career stage and covariates on retinal detachment risk<sup>a,b</sup>**

|                                                    | Odds Ratio | 95% Confidence Interval | p-Value |
|----------------------------------------------------|------------|-------------------------|---------|
| <b>Surgeon Level Effects</b>                       |            |                         |         |
| Late career <sup>c</sup>                           | 1.57       | 0.94 to 2.61            | 0.085   |
| Early career <sup>c</sup>                          | 1.18       | 0.61 to 2.27            | 0.624   |
| Surgical volume (25-250 cases/year) <sup>d</sup>   | 2.06       | 0.86 to 4.93            | 0.104   |
| Surgical volume (251-500 cases/year) <sup>d</sup>  | 0.90       | 0.42 to 1.92            | 0.787   |
| Surgical volume (501-1000 cases/year) <sup>d</sup> | 1.06       | 0.57 to 1.96            | 0.854   |
| <b>Patient Level Effects</b>                       |            |                         |         |
| Female gender                                      | 0.52       | 0.32 to 0.83            | 0.007   |
| Age (71-75) <sup>e</sup>                           | 1.72       | 0.88 to 3.33            | 0.111   |
| Age (76-80) <sup>e</sup>                           | 1.01       | 0.47 to 2.18            | 0.981   |
| Age (≥81) <sup>e</sup>                             | 1.39       | 0.70 to 2.74            | 0.348   |
| Number of unique medications used <sup>f</sup>     | 0.98       | 0.93 to 1.02            | 0.313   |
| Glaucoma medication use <sup>g</sup>               | 0.99       | 0.45 to 2.17            | 0.977   |
| Tamsulosin use <sup>f</sup>                        | 1.14       | 0.48 to 2.75            | 0.763   |
| Diabetes                                           | 1.25       | 0.76 to 2.06            | 0.381   |
| <b>Non-academic surgical center</b> <sup>h</sup>   | 0.65       | 0.40 to 1.07            | 0.089   |

<sup>a</sup> Overall cataract surgery complications represent a composite of the four individual cataract surgical complications (posterior capsule rupture, dropped lens fragments, retinal detachment, and suspected endophthalmitis).

<sup>b</sup> Adjusted for calendar year to control for secular trends

<sup>c</sup> Reference category: Mid career (15-25 years since medical school graduation)

<sup>d</sup> Reference category: Surgical volume (>1000 cases/year)

<sup>e</sup> Reference category: Age (66-70 years)

<sup>f</sup> Within the year preceding surgery

<sup>g</sup> Within the 90 days preceding surgery

<sup>h</sup> Reference category: Academic surgical center

**eTable 4. Effect of late surgeon career stage and covariates on suspected endophthalmitis risk<sup>a,b</sup>**

|                                                    | Odds Ratio | 95% Confidence Interval | p-Value |
|----------------------------------------------------|------------|-------------------------|---------|
| <b>Surgeon Level Effects</b>                       |            |                         |         |
| Late career <sup>c</sup>                           | 1.41       | 1.01 to 1.98            | 0.046   |
| Early career <sup>c</sup>                          | 1.58       | 1.07 to 2.33            | 0.023   |
| Surgical volume (25-250 cases/year) <sup>d</sup>   | 2.67       | 1.48 to 4.81            | 0.001   |
| Surgical volume (251-500 cases/year) <sup>d</sup>  | 1.26       | 0.75 to 2.12            | 0.386   |
| Surgical volume (501-1000 cases/year) <sup>d</sup> | 1.27       | 0.80 to 2.02            | 0.307   |
| <b>Patient Level Effects</b>                       |            |                         |         |
| Female Gender                                      | 0.66       | 0.52 to 0.83            | <0.001  |
| Age (71-75) <sup>e</sup>                           | 0.85       | 0.61 to 1.19            | 0.348   |
| Age (76-80) <sup>e</sup>                           | 0.90       | 0.63 to 1.28            | 0.545   |
| Age (≥81) <sup>e</sup>                             | 1.21       | 0.89 to 1.65            | 0.228   |
| Number of unique medications used <sup>f</sup>     | 1.03       | 1.01 to 1.05            | 0.002   |
| Glaucoma medication use <sup>g</sup>               | 1.04       | 0.72 to 1.52            | 0.826   |
| Tamsulosin use <sup>f</sup>                        | 0.69       | 0.41 to 1.17            | 0.172   |
| Diabetes                                           | 0.99       | 0.77 to 1.28            | 0.946   |
| <b>Non-academic surgical center <sup>h</sup></b>   | 0.71       | 0.51 to 0.99            | 0.043   |

<sup>a</sup> Overall cataract surgery complications represent a composite of the four individual cataract surgical complications (posterior capsule rupture, dropped lens fragments, retinal detachment, and suspected endophthalmitis).

<sup>b</sup> Adjusted for calendar year to control for secular trends

<sup>c</sup> Reference category: Mid career (15-25 years since medical school graduation)

<sup>d</sup> Reference category: Surgical volume (>1000 cases/year)

<sup>e</sup> Reference category: Age (66-70 years)

<sup>f</sup> Within the year preceding surgery

<sup>g</sup> Within the 90 days preceding surgery

<sup>h</sup> Reference category: Academic surgical center
